# Supplementary material
Source: Springer Nature journal article supplement (https://www.springermedizin.de/resource/supplementary/12889_2012_5183_MOESM2_ESM.pdf/9494690)
Supplement: MOESM2 [file 9494690]

April 2005

**Enrollment**  
(Matching 8 pairs  
of branches)

**8 branches for intervention group**  
(30 communities)

**8 branches for control group**  
(28 communities)

4 communities lost  
Reason: volunteer  
team did not worked

1 community did not  
receive assessment  
Reason: logistical  
constraints

(26 communities)

**266 Mother-child dyads  
received intervention**

**Baseline  
assessment**

Sep 2005 – Mar 2006

(27 communities)

**337 Mother-child dyads  
allocated to control group**

**70 Mother-child dyads  
lost**  
41 moved away  
18 refused to participate  
8 not available  
1 lost during pregnancy  
2 neonatal deaths

**74 Mother-child dyads  
lost**  
46 moved away  
3 refused to participate  
15 not available  
4 lost during pregnancy  
5 neonatal deaths

**196 Mother-child dyads  
completed follow-up**

**Final outcome  
assessment**  
(children 13-24 months old)

Apr – Sep 2007

**263 Mother-child dyads  
completed follow-up**

**3 Mother-child dyads  
excluded**  
2 twin birth  
1 heart disease

**4 Mother-child dyads  
excluded**  
3 twin birth  
1 heart disease

**193 Mother-child dyads  
analyzed**

**Analysis**

**259 Mother-child dyads  
analyzed**
